# Supplementary material for: Early IL-6 signalling promotes IL-27 dependent maturation of regulatory T cells in the lungs and resolution of viral immunopathology
Source: PLOS journal article supplement (doi:10.1371/journal.ppat.1006640), 2017-09-27
Supplement: S3 (10.1371/journal.ppat.1006640.s003) [file journal.ppat.1006640.s003]

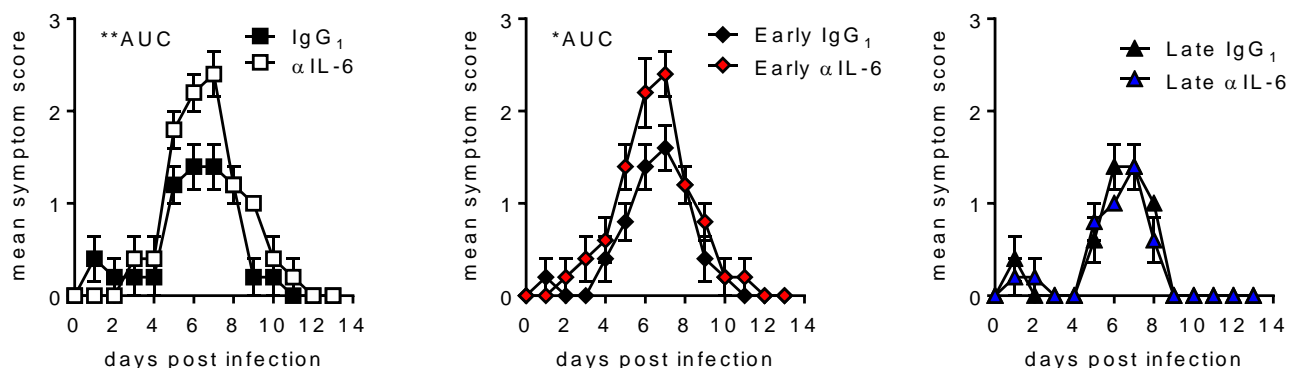

**Supplemental Figure 3. Early, but not late, IL-6 signalling regulates RSV induced disease.** 8 week old BALB/c female mice were infected with  $8 \times 10^5$  ffu of RSV A2 i.n. and dosed with either αIL-6 or isotype control antibody as shown in Figure 5A. Clinical symptom scores were taken daily. Data are representative of  $n = 5$  mice per group and 2 independent experiments. Area under the curve (AUC) was calculated and Mann-Whitney test between control and αIL-6 treated groups for each regime carried out.
